# Supplementary material
Source: PubMed Central journal article supplement (PMC5175444)
Supplement: Supp_Data.pdf [file Supp_Data.pdf]

## **Supplementary Information**

### **Cryopreservation of brain endothelial cells derived from human induced pluripotent stem cells is enhanced by ROCK inhibition**

Hannah K. Wilson, Madeline G. Faubion, Michael K. Hjortness, Sean P. Palecek, Eric V. Shusta

#### **Inventory of Supplementary Information**

Table S1

Table S2

Figure S1

Figure S2

Figure S3

Figure S4

Figure S5

Figure S6

Figure S7

**Supplementary Table S1: Primer sequences for qPCR experiments.**

| <b>Target</b>  | <b>Forward sequence (5'-3')</b> | <b>Reverse sequence (5'-3')</b> |
|----------------|---------------------------------|---------------------------------|
| AGER           | GTAGATTCTGCCTCTGAACTC           | CTTCACAGATACTCCCTTCTC           |
| $\beta$ -actin | CATGTACGTTGCTATCCAGGC           | CTCCTTAATGTCACGCACGAT           |
| BCRP           | TCATTTAGTTTGTGAGTGGGTG          | CAGGTATGTGAAAAGCAGGAAT          |
| GLUT-1         | AACTCTTCAGCCAGGGTCCAC           | CACAGTGAAGATGATGAAGAC           |
| INSR           | TGTTTCATCCTCTGATTCTCTG          | GCTTAGATGTTCCCAAAGTC            |
| LDLR           | GCCATTGTCGTCTTTATGTC            | AAACACATACCCATCAACGA            |
| MRP-1          | CTCTATCTCTCCCGACATGACC          | AGCAGACGATCCACAGCAAAA           |
| Occludin       | GACTTCAGGCAGCCTCGTTAC           | GCCAGTTGTGTAGTCTGTCTCA          |
| P-glycoprotein | TTGCTGCTTACATTCAGGTTTCA         | AGCCTATCTCCTGTCGCATTA           |
| STRA6          | TTTGGGAATCGTGCTCTCCG            | AAGGTGAGTAAGCAGGACAAG           |
| TFRC           | GCACAGCTCTCCTATTGAAAC           | GGTATCCCTCTAGCCATTGAG           |
| VE-Cad         | GGTCAAAGTCCCATACTTG             | CGCAATAGACAAGGACATAACAC         |
| ZO-1           | ACCAGTAAGTCGTCCTGATCC           | TCGGCCAAATCTTCTCACTCC           |

**Supplementary Table S2: Immunocytochemistry antibodies.**

| <b>Antibody</b> | <b>Vendor, clone or product number</b> | <b>Dilution</b> |
|-----------------|----------------------------------------|-----------------|
| PECAM-1         | Thermo Scientific, RB-10333            | 1:25            |
| Glut-1          | Thermo Scientific, SPM498              | 1:100           |
| VE-cadherin     | Santa Cruz, BV9                        | 1:25            |
| Occludin        | Invitrogen, OC-3F10                    | 1:50            |
| Claudin-5       | Invitrogen, 4C3C2                      | 1:200           |
| ZO-1            | Invitrogen, ZO1-1A12                   | 1:100           |
| P-gp            | Thermo Scientific, F4                  | 1:25            |
| BCRP            | Millipore, 5D3                         | 1:50            |
| MRP1            | Millipore, QCRL1                       | 1:25            |

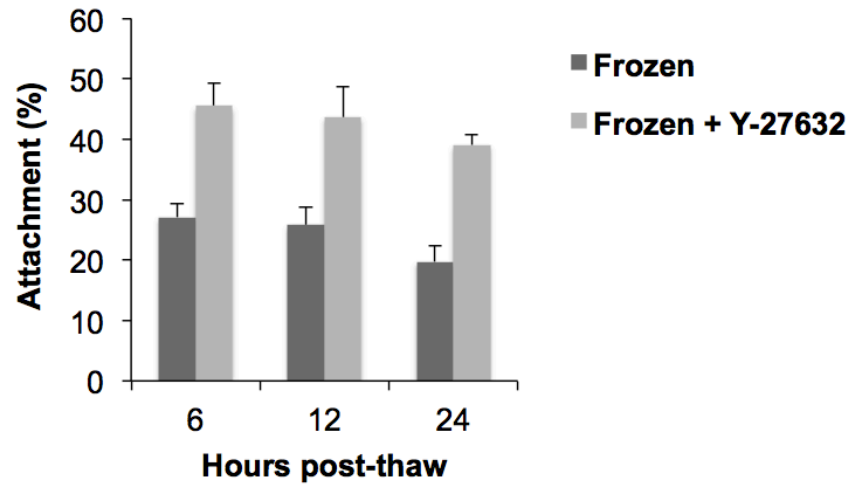

**Supplementary Figure S1: Cell yield of cryopreserved iPSC-BMECs as a function of time.** IMR90-4 iPSC-BMECs were cryopreserved at D8 of differentiation, and cells were thawed with or without 10  $\mu$ M Y-27632. The number of attached cells was quantified at 6, 12, and 24 h post-thaw, normalized to the number of cells seeded and reported as percent attachment. Data represent the average  $\pm$  standard deviation of triplicate wells from a single differentiation, and the experiment was replicated for an additional independent differentiation to confirm trends.

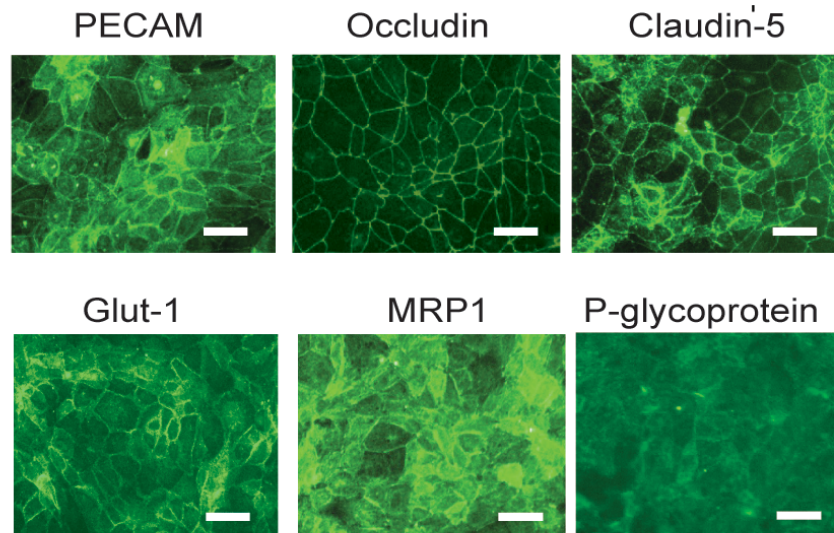

**Supplementary Figure S2: Immunocytochemistry of cryopreserved IMR90-4 iPSC-BMECs.** Immunocytochemistry of IMR90-4 iPSC-BMECs cryopreserved as a purified population. Cells were cryopreserved at D10 of differentiation, and immunocytochemistry was performed at D12 of differentiation, 2 days post-thaw. Scale bars, 50  $\mu$ m.

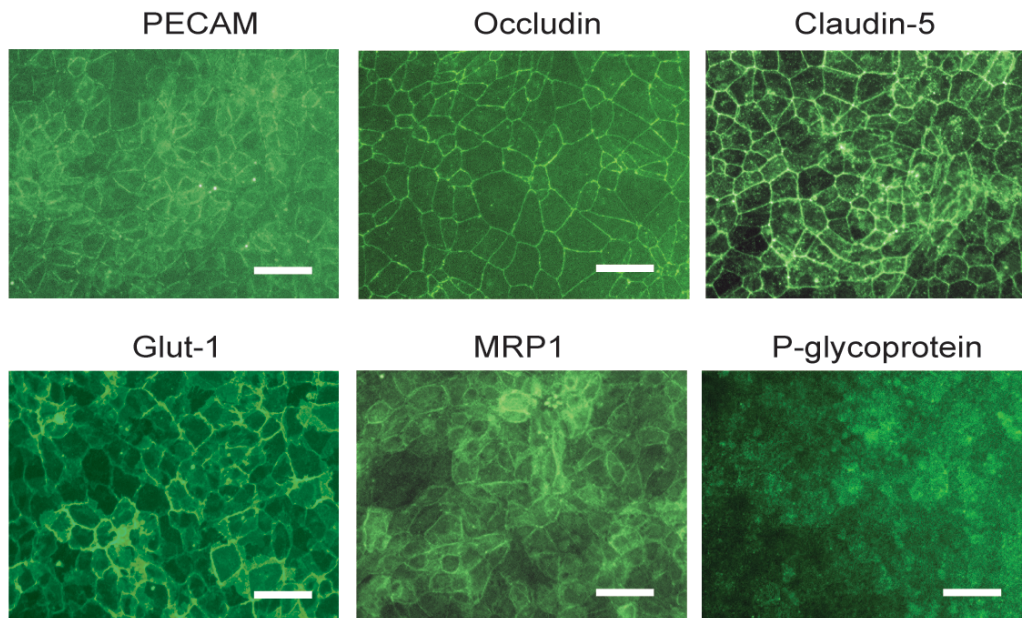

**Supplementary Figure S3: Immunocytochemistry of CS03iCTRn2 iPSC-BMECs.**

CS03iCTRn2 iPSC-BMECs were cryopreserved on D8 of differentiation, and immunocytochemistry was performed on D10 of differentiation, 2 days post-thaw. Scale bars, 50  $\mu\text{m}$ .

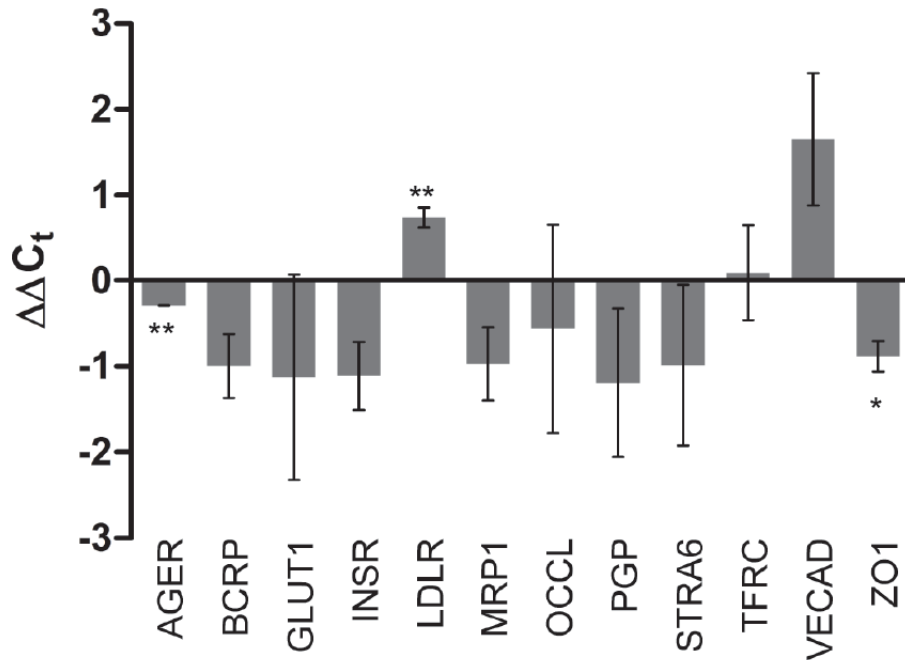

**Supplementary Figure S4: Quantitative PCR of endothelial and BBB genes normalized to  $\beta$ -actin expression.** IMR90-4 iPSC-BMECs were subcultured and/or cryopreserved at D8 of differentiation and RNA was collected on D10, 2 days post-thaw. Positive  $\Delta\Delta C_t$  values indicate increased expression in frozen iPSC-BMECs compared to non-frozen control. Frozen samples were paired to non-frozen samples from the same differentiation. Data represent the average  $\pm$  standard deviation of three independent differentiations. Statistical significance was calculated via Student's unpaired t test (\* $p < 0.05$ , \*\* $p < 0.01$ ).

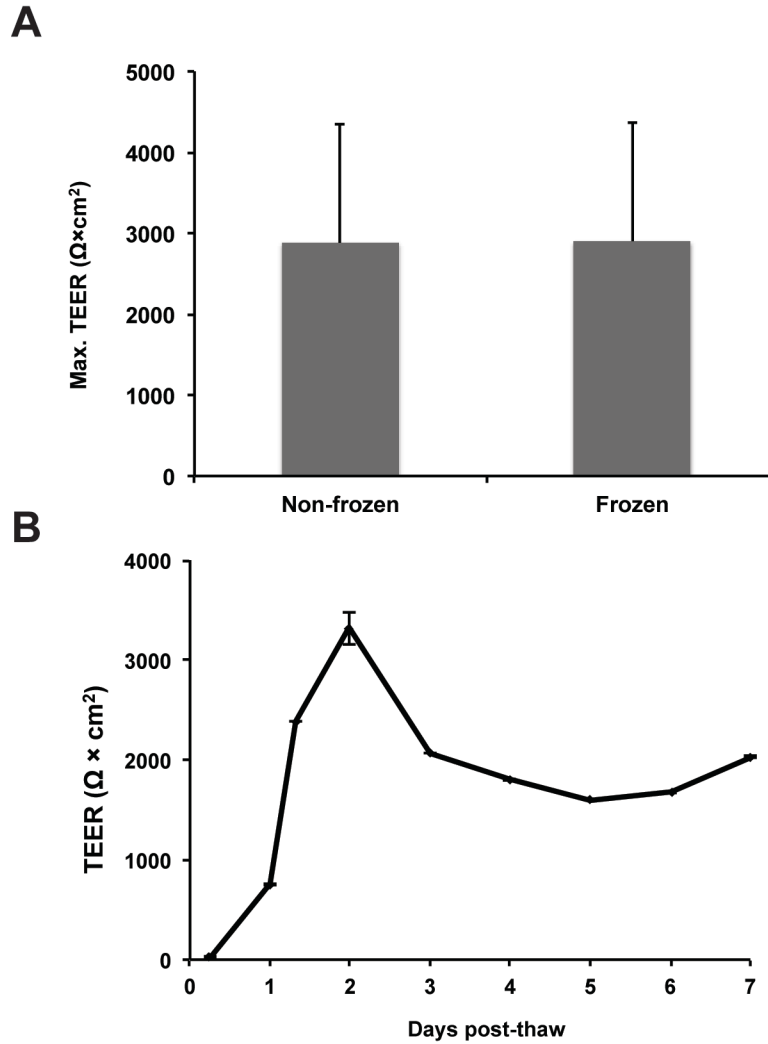

**Supplementary Figure S5: TEER of cryopreserved CS03iCTRn2 iPSC-BMECs.** (A) Maximum TEER values of CS03iCTRn2 iPSC-BMECs cryopreserved at D8 of differentiation. Data represent the average  $\pm$  standard deviation of eight independent differentiations. (B) Representative TEER profile of CS03iCTRn2 iPSC-BMECs cryopreserved at D8 of differentiation. Data represent the average  $\pm$  standard deviation of triplicate Transwell filters from a single differentiation, and the experiment was replicated for three additional independent differentiations to confirm trends.



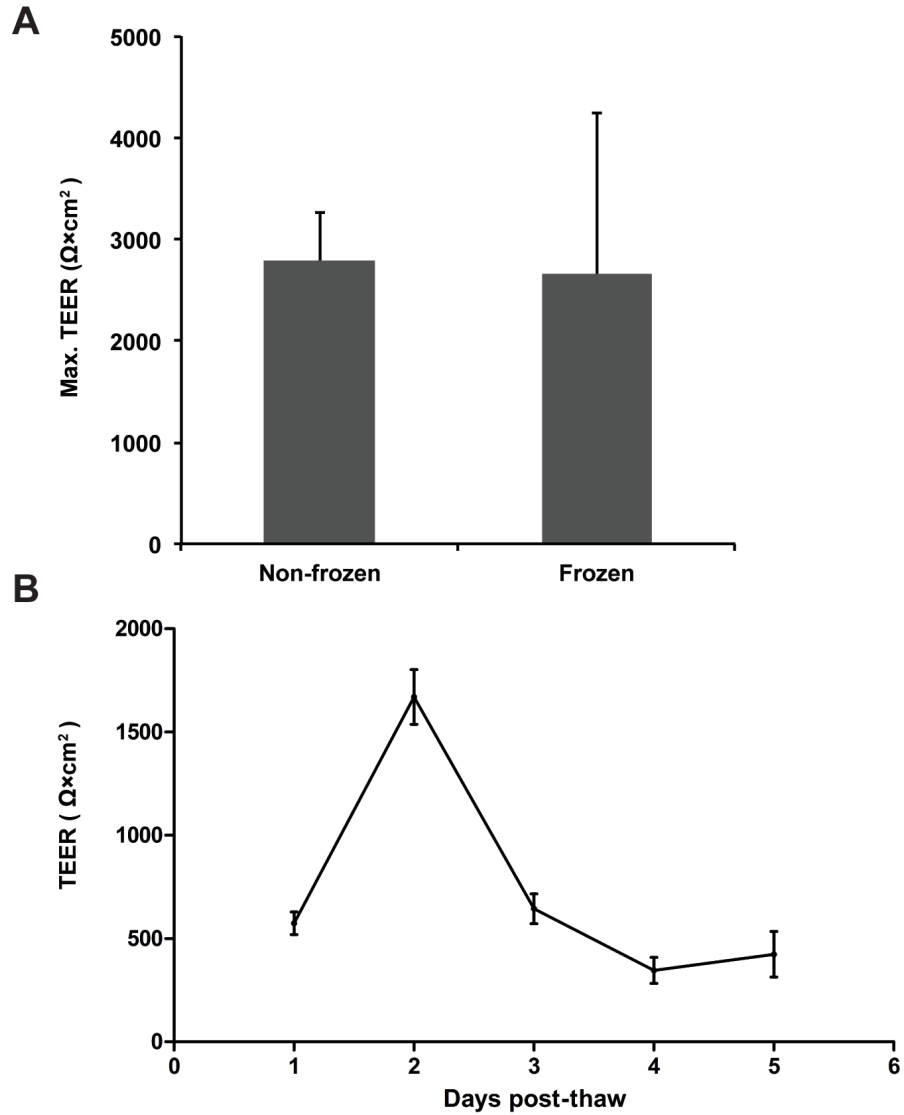

**Supplementary Figure S6: TEER of profile of IMR90-4 iPSC-BMECs cryopreserved at D10.** (A) Maximum TEER values of IMR90-4 iPSC-BMECs cryopreserved as a purified population at D10 of differentiation. Data represent the average  $\pm$  standard deviation of three independent differentiations. (B) Representative TEER profile of IMR90-4 iPSC-BMECs cryopreserved at D10. Data represent the average  $\pm$  standard deviation of triplicate Transwell filters from a single differentiation, and the experiment was replicated for two additional independent differentiations to confirm trends.

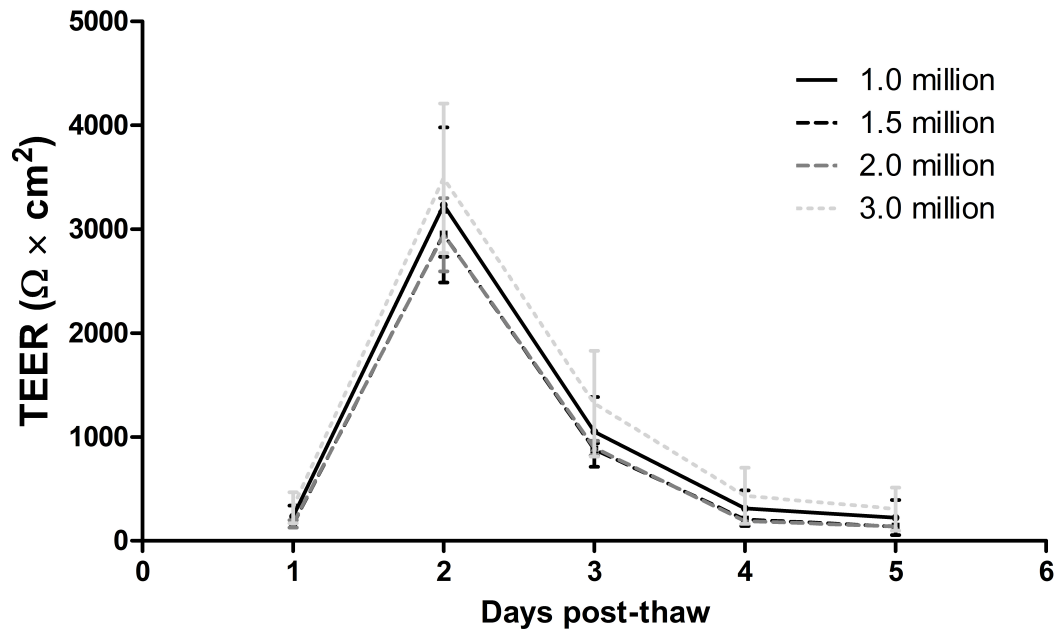

**Supplementary Figure S7: Effect of filter seeding density on TEER profile of cryopreserved cells.** IMR90-4 iPSC-BMECs were cryopreserved at D8 of differentiation and seeded onto Transwell filters at various densities. Data represent the average  $\pm$  standard deviation of triplicate Transwell filters from a single differentiation, and experiments were replicated for an additional independent differentiation to confirm trends. The 1.5 million dataset is located under the 2.0 million dataset.
